# Supplementary material for: Oestrogen Non-Genomic Signalling is Activated in Tamoxifen-Resistant Breast Cancer
Source: MDPI journal article supplement (doi:10.3390/ijms20112773), 2019-06-05
Supplement: s1 [file s1]

Supplementary information

**Oestrogen non-genomic signalling is activated in tamoxifen-resistant  
breast cancers**

Coralie Poulard, Julien Jacquemetton, Olivier Trédan, Pascale A. Cohen, Julie Vendrell,  
Sandra E. Ghayad, Isabelle Treilleux, Elisabetta Marangoni and Muriel Le Romancer

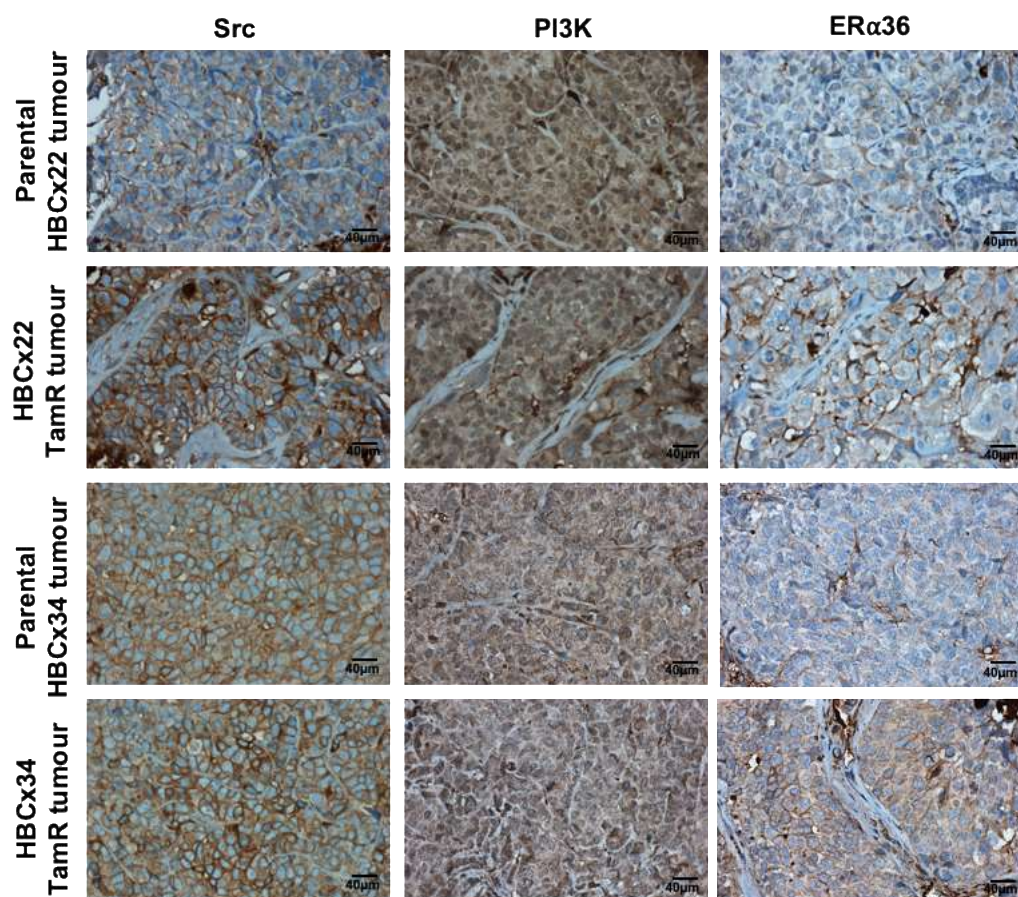

**Supplementary Fig 1. Study of Src, PI3K and ER $\alpha$ -36 expression in parental and resistant PDXs.** IHC experiments were performed on tumours embedded in paraffin using the corresponding antibodies.

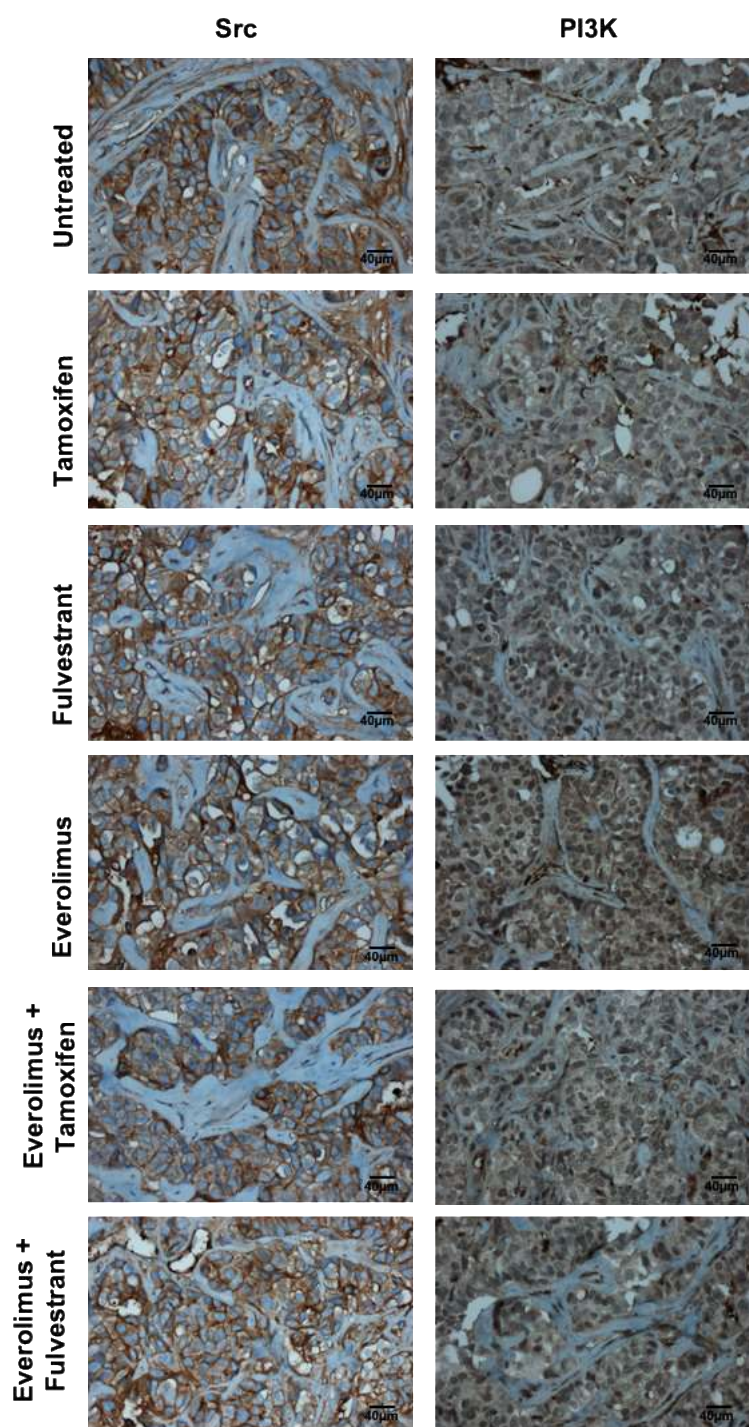

**Supplementary Fig 2. IHC analysis of treated tumours.** Representative sections of TMA obtained from therapeutic experiments on HBCx22 TamR.

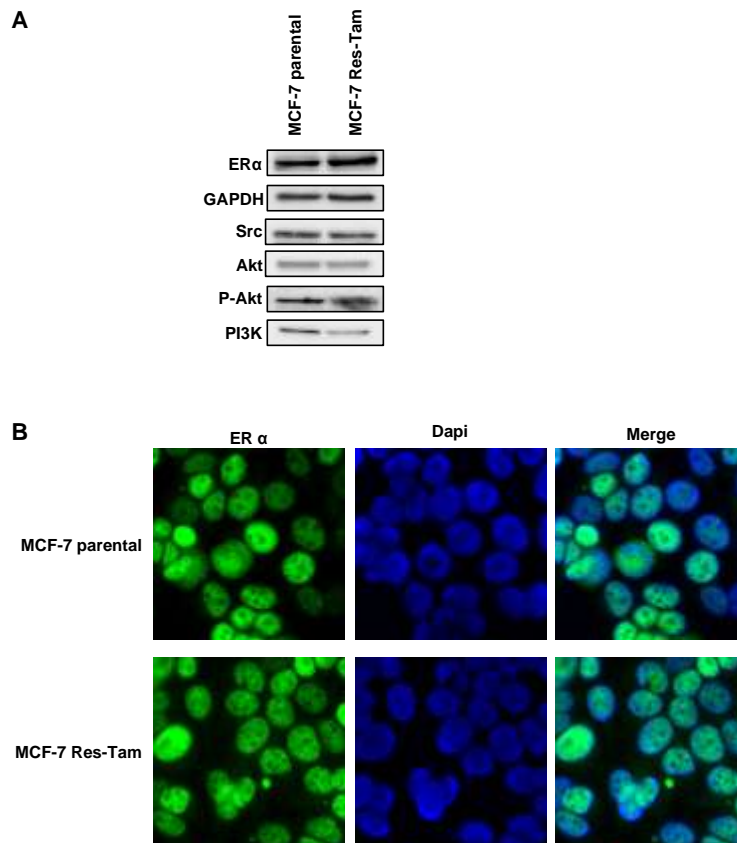

**Supplementary Fig 3. Study of the expression of the members of the oestrogen non genomic pathway in parental and tamoxifen resistant MCF-7 cells.** (A) Cell lysates of parental and tamoxifen resistant MCF-7 cells were analysed for ER $\alpha$ , Src, PI3K, P-Akt, Akt and GAPDH expression by Western blot. (B) Methanol-fixed cells were stained with an anti-ER $\alpha$  antibody. The nuclei were counterstained with mounting medium containing DAPI (blue) (x60 magnification).
